# Supplementary material for: Recent developments in the structural characterisation of the IR and IGF1R: implications for the design of IR–IGF1R hybrid receptor modulators
Source: Royal Society of Chemistry journal article supplement (doi:10.1039/d1md00300c), 2022-01-01
Supplement: d1md00300c1.pdf [file d1md00300c1.pdf]

## Supplementary figures

Table S1: A summary of all the current IR, IGF1R and hybrid receptor structures. Small molecule bound kinase structures have been omitted for clarity.

| Receptor | Construct                                                          | Technique | Fab                | Ligand                                      | Resolution (Å) | PDB  | Date     |
|----------|--------------------------------------------------------------------|-----------|--------------------|---------------------------------------------|----------------|------|----------|
| IR       | TK domain (apo)                                                    | XRCD      | None               | -                                           | 2.1            | 1IRK | 1994(1)  |
| IR       | TK domain (activated)                                              | XRCD      | None               | -                                           | 1.9            | 1IR3 | 1997(2)  |
| IR       | L1-CR-L2                                                           | XRCD      | None               | None                                        | 2.3            | 2HR7 | 2006(3)  |
| IR       | ECD homodimer                                                      | XRCD      | 2 x (83-7 + 83-14) | None                                        | 3.8            | 2DTG | 2006(4)  |
|          |                                                                    |           |                    |                                             | 3.8            | 3LOH | 2010(5)  |
| IR       | L1-CR + $\alpha$ CT <sup>704-719</sup>                             | XRCD      | 83-7               | Ins                                         | 3.9            | 3W11 | 2013(6)  |
|          |                                                                    |           |                    |                                             | 3.3            | 40GA | 2014(7)  |
| IR       | [L1-CR-L2-(FnIII-I)- $\alpha$ CT <sup>704-719</sup> ] <sub>2</sub> | XRCD      | 2 x 83-14          | Ins                                         | 4.4            | 3W14 | 2013(6)  |
| IR       | L1-CR + $\alpha$ CT <sup>697-719</sup>                             | XRCD      | 83-7               | [D-Pro <sup>B26</sup> ]-DTI-NH <sub>2</sub> | 4.3            | 3W13 | 2013(6)  |
| IR       | TM domain                                                          | NMR       | None               | -                                           | -              | 2MFR | 2014(8)  |
| IR       | L1-CR- $\alpha$ CT <sup>697-719</sup>                              | XRCD      | None               | None                                        | 3.0            | 4XST | 2015(9)  |
| IR       | ECD homodimer                                                      | XRCD      | 2 x (83-7 + 83-14) | None                                        | 3.3            | 4ZXB | 2016(10) |
| IR       | ECD homodimer                                                      | EM        | None               | 2 x Ins                                     | 4.3            | 6CE9 | 2018(11) |
|          |                                                                    |           |                    | 1 x Ins                                     | 7.4            | 6CE7 |          |
| IR       | ECD homodimer (w / leucine zipper)                                 | EM        | None               | 1 x Ins                                     | 3.2            | 6HN5 | 2018(12) |
|          |                                                                    |           |                    |                                             | 4.2            | 6HN4 |          |
| IR       | Full length (Only ECD modelled)                                    | EM        | None               | 4 x Ins                                     | 3.2            | 6PXV | 2019(13) |
|          |                                                                    |           |                    |                                             | 3.2            | 6PXW |          |
| IR       | ECD homodimer                                                      | EM        | None               | 4 x Ins                                     | 4.3            | 6SOF | 2020(14) |
| IGF1R    | TKD (activated)                                                    | XRCD      | None               | -                                           | 2.1            | 1K3A | 2001(15) |
| IGF1R    | TKD (apo)                                                          | XRCD      | None               | -                                           | 1.5            | 1P4O | 2003(16) |

|        |                                                   |      |           |          |     |          |          |
|--------|---------------------------------------------------|------|-----------|----------|-----|----------|----------|
| IGF1R  | L1-CR-L2                                          | XRCD | None      | None     | 2.6 | 1IGR     | 1998(17) |
| IGF1R  | ECD Homodimer                                     | XRCD | 2 x 24-60 | None     | 3.0 | 5U8R     | 2018(18) |
|        |                                                   |      |           | 2 x IGF1 | 3.3 | 5U8Q     |          |
| IGF1R  | Full length                                       | EM   | None      | IGF1     | 4.3 | 6PYH     | 2019(19) |
| IGF1R  | ECD homodimer                                     | EM   | None      | Ins      | 4.7 | 6JK8     | 2020(20) |
|        |                                                   |      |           | IGF1     | 7.7 | EMD-0741 |          |
| IGF1R  | Full length (Leucine zipper)                      | EM   | None      | IGF2     | 3.2 | 6VWG     | 2020(21) |
|        |                                                   |      |           |          | 4.3 | 6VWH     |          |
|        |                                                   |      |           |          | 3.7 | 6VWI     |          |
|        |                                                   |      |           |          | 4.2 | 6VWJ     |          |
| Hybrid | IR: L1-CR + IGF1R: $\alpha$ CT <sup>691-706</sup> | XRCD | None      | IGF1     | 3.0 | 4XSS     | 2015(9)  |

## Supplemental References

1. Stevan RH, Lei W, Wayne AH. Crystal structure of the tyrosine kinase domain of the human insulin receptor. *Nature*. 1994;372(6508):746.
2. Hubbard SR. Crystal structure of the activated insulin receptor tyrosine kinase in complex with peptide substrate and ATP analog. *The EMBO journal*. 1997;16(18):5572-81.
3. Meizhen L, Thomas PJG, Neil MM, Peter AH, Epa VC, John DB, et al. The first three domains of the insulin receptor differ structurally from the insulin-like growth factor 1 receptor in the regions governing ligand specificity. *Proceedings of the National Academy of Sciences*. 2006;103(33):12429.
4. McKern NM, Lawrence MC, Streltsov VA, Lou MZ, Adams TE, Lovrecz GO, et al. Structure of the insulin receptor ectodomain reveals a folded-over conformation. *Nature*. 2006;443(7108):218-21.
5. Smith BJ, Huang K, Kong G, Chan SJ, Nakagawa S, Menting JG, et al. Structural resolution of a tandem hormone-binding element in the insulin receptor and its implications for design of peptide agonists. *Proc Natl Acad Sci U S A*. 2010;107(15):6771-6.
6. Menting JG, Whittaker J, Margetts MB, Whittaker LJ, Kong GK, Smith BJ, et al. How insulin engages its primary binding site on the insulin receptor. *Nature*. 2013;493(7431):241-5.
7. Menting JG, Yang Y, Chan SJ, Phillips NB, Smith BJ, Whittaker J, et al. Protective hinge in insulin opens to enable its receptor engagement. *Proc Natl Acad Sci U S A*. 2014;111(33):E3395-404.
8. Li Q, Wong YL, Kang C. Solution structure of the transmembrane domain of the insulin receptor in detergent micelles. *Biochim Biophys Acta*. 2014;1838(5):1313-21.
9. John, Callum, Geoffrey, Mai, Colin, Michael. Structural Congruency of Ligand Binding to the Insulin and Insulin/Type 1 Insulin-like Growth Factor Hybrid Receptors. *Structure*. 2015;23(7):1271-82.
10. Croll TI, Smith BJ, Margetts MB, Whittaker J, Weiss MA, Ward CW, et al. Higher-Resolution Structure of the Human Insulin Receptor Ectodomain: Multi-Modal Inclusion of the Insert Domain. *Structure*. 2016;24(3):469-76.
11. Scapin G, Dandey VP, Zhang Z, Prosis W, Hruza A, Kelly T, et al. Structure of the insulin receptor-insulin complex by single-particle cryo-EM analysis. *Nature*. 2018;556(7699):122-5.
12. Weis F, Menting JG, Margetts MB, Chan SJ, Xu Y, Tennagels N, et al. The signalling conformation of the insulin receptor ectodomain. *Nat Commun*. 2018;9(1):4420.
13. Uchikawa E, Choi E, Shang GJ, Yu HT, Bai XC. Activation mechanism of the insulin receptor revealed by cryo-EM structure of the fully liganded receptor-ligand complex. *Elife*. 2019;8.
14. Gutmann T, Schafer IB, Poojari C, Brankatschk B, Vattulainen I, Strauss M, et al. Cryo-EM structure of the complete and ligand-saturated insulin receptor ectodomain. *J Cell Biol*. 2020;219(1).
15. Favellyukis S, Till JH, Hubbard SR, Miller WT. Structure and autoregulation of the insulin-like growth factor 1 receptor kinase. *Nature Structural Biology*. 2001;8(12):1058-63.
16. Munshi S, Hall DL, Kornienko M, Darke PL, Kuo LC. Structure of apo, unactivated insulin-like growth factor-1 receptor kinase at 1.5 Å resolution. *Acta Crystallographica Section D*. 2003;59(10):1725-30.

17. Thomas PJG, Neil MM, Meizhen L, Maurice JF, John DB, George OL, et al. Crystal structure of the first three domains of the type-1 insulin-like growth factor receptor. *Nature*. 1998;394(6691):395.
18. Xu Y, Kong GK, Menting JG, Margetts MB, Delaine CA, Jenkin LM, et al. How ligand binds to the type 1 insulin-like growth factor receptor. *Nat Commun*. 2018;9(1):821.
19. Li J, Choi E, Yu H, Bai XC. Structural basis of the activation of type 1 insulin-like growth factor receptor. *Nat Commun*. 2019;10(1):4567.
20. Zhang X, Yu D, Sun J, Wu Y, Gong J, Li X, et al. Visualization of Ligand-Bound Ectodomain Assembly in the Full-Length Human IGF-1 Receptor by Cryo-EM Single-Particle Analysis. *Structure*. 2020;28(5):555-61 e4.
21. Xu Y, Kirk NS, Venugopal H, Margetts MB, Croll TI, Sandow JJ, et al. How IGF-II Binds to the Human Type 1 Insulin-like Growth Factor Receptor. *Structure*. 2020.
